# Supplementary material for: Analytical magnetostatic model for 2D arrays of interacting magnetic nanowires and nanotubes
Source: Royal Society of Chemistry journal article supplement (doi:10.1039/d0cp00808g), 2020-01-01
Supplement: d0cp00808g1.pdf [file d0cp00808g1.pdf]

# Analytical magnetostatic model for 2D arrays of interacting magnetic nanowires and nanotubes

Y. G. Velázquez<sup>1</sup> and A. Encinas<sup>1,\*</sup>

<sup>1</sup>División de Materiales Avanzados, Instituto Potosino de Investigación Científica y Tecnológica, Camino a la Presa de San José 2055, 78216 San Luis Potosí, SLP, Mexico

\*armando.encinas@ipicyt.edu.mx

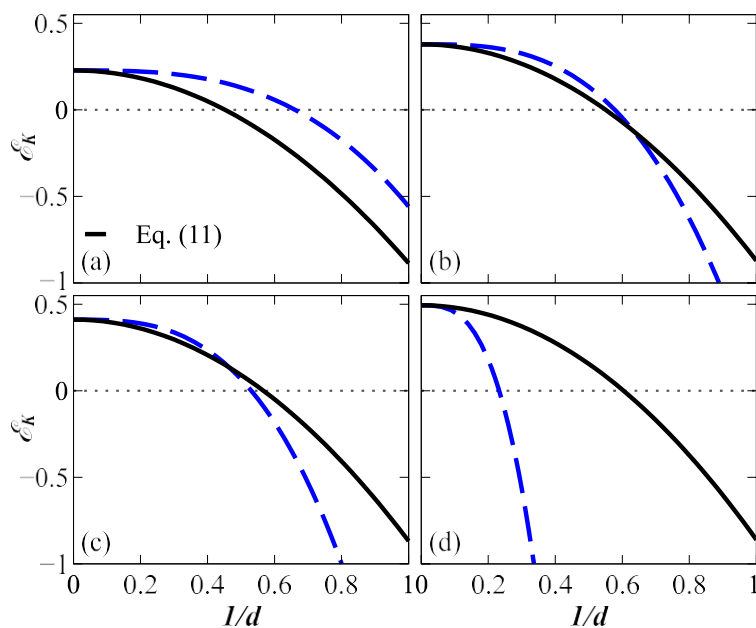

**Figure S11.** Reduced magnetic anisotropy energy  $E_k$  as a function of the reciprocal reduced center to center distance  $1/d = \varphi/D$  for an array of NWs with aspect ratio (a)  $t = 2$ , (b)  $t = 5$ , (c)  $t = 7$  and (d)  $t = 100$ , calculated using Eq. (11) [continuous line] and modifying the first term of Eq. (15) [dashed blue line].

**Table 1.** Coordinates (reduced center-to-center distance and aspect ratio) for the prediction of the easy axis orientation in magnetic NW arrays using Eq. (17) for those studies that report the EART in these systems.

| Sample | $d=D/\varphi$          | $\tau=h/\varphi$ | Easy axis   |             | Reference |
|--------|------------------------|------------------|-------------|-------------|-----------|
|        |                        |                  | Reference   | Model       |           |
| NiFe   | 1.44                   | 55.55            | Para        | Para        | 1         |
|        | 1.85                   | 71.42            | Para        | Para        |           |
|        | 2.6                    | 100              | Perp        | Perp        |           |
| CoFeB  | 1.35                   | 5                | Perp        | Perp        | 2         |
|        | 1.35                   | 49.5             | Perp        | Perp        |           |
|        | 1.35                   | 149.5            | Perp        | Perp        |           |
|        | 2.6                    | 600              | Perp        | Perp        |           |
|        | 1.23                   | 70.58            | Perp        | Perp        |           |
|        | 1.56                   | 89.55            | <b>Para</b> | <b>Perp</b> |           |
|        | 1.75                   | 3.33             | <b>Para</b> | <b>Perp</b> |           |
|        | 1.75                   | 8.33             | Perp        | Perp        |           |
| Ni     | Continued on next page |                  |             |             |           |

**Table 1 – continued from previous page**

| Sample | $d=D/\phi$ | $\tau=h/\phi$ | Easy axis   |             | Reference |
|--------|------------|---------------|-------------|-------------|-----------|
|        |            |               | Reference   | Model       |           |
|        | 1.75       | 13.33         | Para        | Para        |           |
|        | 1.75       | 23.33         | Para        | Para        |           |
|        | 1.75       | 100           | Para        | Para        |           |
|        | 1.75       | 400           | Para        | Para        |           |
|        | 2.72       | 9.09          | Para        | Para        |           |
|        | 3          | 171.42        | Para        | Para        |           |
| Ni     | 1.71       | 3.5           | Perp        | Perp        | 4         |
|        | 1.71       | 7             | Perp        | Perp        |           |
|        | 1.71       | 14            | Perp        | Perp        |           |
|        | 1.71       | 28            | <b>Perp</b> | <b>Para</b> |           |
| Co     | 1.61       | 15.38         | Perp        | Perp        | 5         |
|        | 3          | 28.57         | Para        | Para        |           |
| Ni     | 1.5        | 20            | Perp        | Perp        | 6         |
|        | 2.5        | 200           | Para        | Para        |           |
| NiFe   | 1.44       | 55.55         | Perp        | Perp        | 7         |
|        | 1.75       | 41.66         | <b>Perp</b> | <b>Para</b> |           |
|        | 1.85       | 71.42         | Para        | Para        |           |
|        | 2.1        | 50            | Para        | Para        |           |
|        | 2.6        | 100           | Para        | Para        |           |
| Co     | 2.62       | 62.5          | Para        | Para        | 8         |
|        | 1.5        | 142.85        | Perp        | Perp        |           |
|        | 2.1        | 200           | <b>Perp</b> | <b>Para</b> |           |
|        | 2.62       | 5             | Para        | Para        |           |
|        | 2.62       | 10            | Para        | Para        |           |
|        | 2.62       | 250           | Para        | Para        |           |

## References

1. Tartakovskaya, E. V., Pardavi-Horvath, M. & Vázquez, M. Configurational spin reorientation phase transition in magnetic nanowire arrays. *Journal of Magnetism and Magnetic Materials* **322**, 743–747 (2010).
2. Ciureanu, M. *et al.* Magnetic properties of electrodeposited cofeb thin films and nanowire arrays. *Electrochimica Acta* **50**, 4487 (2005). URL <https://doi.org/10.1016/j.electacta.2005.02.011>.
3. Kartopu, G. *et al.* Size effects and origin of easy-axis in nickel nanowire arrays. *Journal Applied Physics* **109**, 033909 (2011). URL <https://doi.org/10.1063/1.3531565>.
4. Das, B. & Mandal, K. Effect of aspect ratio on the magnetic properties of nickel nanowires. *Journal of Applied Physics* **103**, 031908 (2008). URL <http://dx.doi.org/10.1063/1.2828026>.
5. Vázquez, M. & Vivas, L. G. Magnetization reversal in co base nanowire arrays. *Physica Status Solidi B* **248**, 2368 (2011). URL <https://doi.org/10.1002/pssb.201147092>.
6. Khalid, S., Sharif, R. & Shah, Z. H. Tailoring the magnetic easy axis of nickel nanowires by varying diameter. *Surface Review and Letters* **23**, 1650024 (2016).
7. Pardavi-Horvath, M., Si, P. E., Vazquez, M., Rosa, W. O. & Badini, G. Interaction effects in permalloy nanowire systems. *Journal of Applied Physics* **103**, 07D517 (2008). URL <https://doi.org/10.1063/1.2833304>.
8. Kartopu, G., Yalçın, O., Es-Souni, M. & Basaran, A. C. Magnetization behavior of ordered and high density co nanowire arrays with varying aspect ratio. *Journal of Applied Physics* **103**, 093915 (2008).
